# Supplementary material
Source: publisher figshare collection journal article supplement (https://tandf.figshare.com/articles/dataset/_/1568470)
Supplement: Supplementary file 1 [file 3]

Tab. 1 suppl. – Mean temperature (°C) and standard deviation of three meteorological stations located near the study area (Aulla, Moncigoli, Fivizzano) in May, June and July 2013. The recording days are shaded.

| Day | Temperature (°C) |       |       |       |       |      |
|-----|------------------|-------|-------|-------|-------|------|
|     | May              |       | June  |       | July  |      |
|     | Mean             | SD    | Mean  | SD    | Mean  | SD   |
| 1   | 15.80            | 2.21  | 15.20 | 0.35  | 19.70 | 0.29 |
| 2   | 14.33            | 2.00  | 16.07 | 0.12  | 20.23 | 0.21 |
| 3   | 13.77            | 2.02  | 16.70 | 0.56  | 19.60 | 0.08 |
| 4   | 14.03            | 1.74  | 16.13 | 0.68  | 22.03 | 0.17 |
| 5   | 13.27            | 0.21  | 16.70 | 0.30  | 23.93 | 0.17 |
| 6   | 15.37            | 0.45  | 17.70 | 0.10  | 24.50 | 0.28 |
| 7   | 15.20            | 0.40  | 18.07 | 0.21  | 24.43 | 0.29 |
| 8   | 16.10            | 0.26  | 19.17 | 0.12  | 25.43 | 0.12 |
| 9   | 16.60            | 1.08  | 15.50 | 0.36  | 23.53 | 0.25 |
| 10  | 17.30            | 1.47  | 14.80 | 0.79  | 21.53 | 0.42 |
| 11  | 18.90            | 3.47  | 16.93 | 0.21  | 22.27 | 0.25 |
| 12  | 18.10            | 3.67  | 19.37 | 0.06  | 22.13 | 0.37 |
| 13  | 15.30            | 1.05  | 20.83 | 0.21  | 21.57 | 0.45 |
| 14  | 15.17            | 0.85  | 20.57 | 0.15  | 22.77 | 0.25 |
| 15  | 13.90            | 0.72  | 20.60 | 11.89 | 23.33 | 0.31 |
| 16  | 15.13            | 1.36  | 22.57 | 2.20  | 23.67 | 0.21 |
| 17  | 13.37            | 0.25  | 23.03 | 0.23  | 23.70 | 0.42 |
| 18  | 13.23            | 0.12  | 24.93 | 0.32  | 21.73 | 0.12 |
| 19  | 13.10            | 0.10  | 25.30 | 0.00  | 23.37 | 0.38 |
| 20  | 12.40            | 0.17  | 22.87 | 0.06  | 21.93 | 0.47 |
| 21  | 13.43            | 0.59  | 21.63 | 0.32  | 23.50 | 0.24 |
| 22  | 14.77            | 0.47  | 19.27 | 0.15  | 24.80 | 0.28 |
| 23  | 16.97            | 0.49  | 19.40 | 0.44  | 24.67 | 0.21 |
| 24  | 18.00            | 5.89  | 17.87 | 0.74  | 23.53 | 0.25 |
| 25  | 14.83            | 6.11  | 17.83 | 0.23  | 23.70 | 0.24 |
| 26  | 15.30            | 3.17  | 18.50 | 0.70  | 25.40 | 0.22 |
| 27  | 15.47            | 3.03  | 17.50 | 0.17  | 25.43 | 0.17 |
| 28  | 16.00            | 3.57  | 15.93 | 0.91  | 25.23 | 0.12 |
| 29  | 15.77            | 2.67  | 16.87 | 0.25  | 21.87 | 0.39 |
| 30  | 18.15            | 10.48 | 18.93 | 0.23  | 22.67 | 0.21 |
| 31  | 18.75            | 10.83 |       |       | 23.90 | 0.16 |
