# Supplementary material
Source: publisher figshare collection journal article supplement (https://tandf.figshare.com/articles/dataset/_/1568470)
Supplement: Supplementary file 2 [file 3]

Archive with 4 entries (4 files):
- Tab. 3_suppl.pdf
- Tab. 1_suppl.pdf
- Appendix 1_Suppl.Mat_EO_EDIT.pdf
- Tab. 2_suppl.pdf
