# Supplementary material
Source: publisher figshare collection journal article supplement (https://tandf.figshare.com/articles/dataset/_/1568470)
Supplement: Supplementary file 2 [file 3 › Tab. 2_suppl.pdf]

Tab. 2 suppl. - Land mosaic analysis used to characterize the five localities.

| Locality             | Type               | Total Class Area | % Landscape | Number of Patches | Patch Density | Largest Patch Index | Total Edge | Landscape Shape Index |
|----------------------|--------------------|------------------|-------------|-------------------|---------------|---------------------|------------|-----------------------|
| Croce di Tergagliana | WOODLAND           | 23.86            | 84.65       | 1                 | 3.55          | 84.65               | 2946       | 1.56                  |
|                      | ABANDONED FIELD    | 2.55             | 9.06        | 1                 | 3.55          | 9.06                | 980        | 1.53                  |
|                      | SHRUB              | 1.78             | 6.30        | 2                 | 7.09          | 3.31                | 1032       | 1.94                  |
| Virolo               | WOODLAND           | 19.74            | 70.20       | 1                 | 3.56          | 70.20               | 2778       | 1.58                  |
|                      | ORCHARD            | 2.59             | 9.20        | 1                 | 3.56          | 9.20                | 984        | 1.53                  |
|                      | MIXED CULTIVATIONS | 5.79             | 20.60       | 2                 | 7.11          | 12.12               | 2104       | 2.21                  |
| Monte Curto          | WOODLAND           | 13.59            | 48.15       | 2                 | 7.09          | 45.16               | 4225       | 2.89                  |
|                      | MIXED CULTIVATIONS | 6.52             | 23.09       | 3                 | 10.63         | 16.30               | 2894       | 2.86                  |
|                      | LOGGED             | 3.78             | 13.39       | 1                 | 3.54          | 13.39               | 1066       | 1.37                  |
|                      | ORCHARD            | 1.07             | 3.81        | 2                 | 7.09          | 2.23                | 734        | 1.78                  |
|                      | SHRUB              | 3.26             | 11.56       | 1                 | 3.54          | 11.56               | 1026       | 1.44                  |
| Madonna dei Colli    | WOODLAND           | 22.26            | 79.05       | 1                 | 3.55          | 79.05               | 4230       | 2.26                  |
|                      | MOWED GRASS        | 2.30             | 8.18        | 5                 | 17.76         | 3.75                | 1969       | 3.24                  |
|                      | ORCHARD            | 3.59             | 12.77       | 2                 | 7.10          | 10.80               | 1844       | 2.45                  |
| Valenza              | WOODLAND           | 22.25            | 79.04       | 1                 | 3.55          | 79.04               | 4170       | 2.24                  |
|                      | PASTURE            | 1.03             | 3.66        | 4                 | 14.21         | 1.66                | 1294       | 3.17                  |
|                      | URBAN              | 0.21             | 0.76        | 3                 | 10.66         | 0.40                | 464        | 2.49                  |
|                      | VINEYARD           | 1.16             | 4.14        | 2                 | 7.11          | 2.49                | 1152       | 2.67                  |
|                      | MOWED GRASS        | 3.49             | 12.41       | 1                 | 3.55          | 12.41               | 1627       | 2.19                  |
