# Supplementary material
Source: publisher figshare collection journal article supplement (https://tandf.figshare.com/articles/dataset/_/1568470)
Supplement: Supplementary file 2 [file 3 › Tab. 3_suppl.pdf]

Tab. 3 Suppl - List of bird species: total number of songs and number of songs for each locality.

| All localities           |                                  |                 |     |                          |                                  |                 |     | Croce di Tergagliana |  | Virolo          |     | Montecurto |  | Madonna dei Colli |     | Valenza |  |                 |     |
|--------------------------|----------------------------------|-----------------|-----|--------------------------|----------------------------------|-----------------|-----|----------------------|--|-----------------|-----|------------|--|-------------------|-----|---------|--|-----------------|-----|
|                          |                                  | Number of Songs | %   |                          |                                  | Number of Songs | %   |                      |  | Number of Songs | %   |            |  | Number of Songs   | %   |         |  | Number of Songs | %   |
| Blackcap                 | <i>Sylvia atricapilla</i>        | 3392            | 34% | Blackcap                 | <i>Sylvia atricapilla</i>        | 835             | 45% |                      |  | 761             | 36% |            |  | 302               | 19% |         |  | 481             | 38% |
| Blackbird                | <i>Turdus merula</i>             | 2991            | 30% | Blackbird                | <i>Turdus merula</i>             | 640             | 34% |                      |  | 762             | 36% |            |  | 398               | 24% |         |  | 193             | 15% |
| European Robin           | <i>Erithacus rubecula</i>        | 915             | 9%  | Great tit                | <i>Parus major</i>               | 102             | 5%  |                      |  | 18              | 1%  |            |  | 436               | 27% |         |  | 17              | 1%  |
| Great tit                | <i>Parus major</i>               | 581             | 6%  | Subalpine Warbler        | <i>Sylvia cantillans</i>         | 56              | 3%  |                      |  | 3               | 0%  |            |  | 117               | 7%  |         |  | 0               | 0%  |
| Chaffinch                | <i>Fringilla coelebs</i>         | 392             | 4%  | European Robin           | <i>Eritachus rubecula</i>        | 45              | 2%  |                      |  | 171             | 8%  |            |  | 37                | 2%  |         |  | 418             | 33% |
| Nightingale              | <i>Luscinia megarynchos</i>      | 388             | 4%  | Song Thrush              | <i>Turdus philomelos</i>         | 42              | 2%  |                      |  | 1               | 0%  |            |  | 5                 | 0%  |         |  | 91              | 7%  |
| Song Thrush              | <i>Turdus philomelos</i>         | 312             | 3%  | Golden Oriole            | <i>Oriolus oriolus</i>           | 41              | 2%  |                      |  | 58              | 3%  |            |  | 1                 | 0%  |         |  | 0               | 0%  |
| Subalpine Warbler        | <i>Sylvia cantillans</i>         | 193             | 2%  | Chaffinch                | <i>Fringilla coelebs</i>         | 30              | 2%  |                      |  | 107             | 5%  |            |  | 48                | 3%  |         |  | 0               | 0%  |
| Golden Oriole            | <i>Oriolus oriolus</i>           | 145             | 1%  | Turtle Dove              | <i>Streptopelia turtur</i>       | 26              | 1%  |                      |  | 10              | 0%  |            |  | 0                 | 0%  |         |  | 0               | 0%  |
| Turtle Dove              | <i>Streptopelia turtur</i>       | 127             | 1%  | Serin                    | <i>Serinus serinus</i>           | 19              | 1%  |                      |  | 2               | 0%  |            |  | 20                | 1%  |         |  | 0               | 0%  |
| Common Cuckoo            | <i>Cuculus canorus</i>           | 59              | 1%  | Blue tit                 | <i>Cyanistes caeruleus</i>       | 9               | 0%  |                      |  | 3               | 0%  |            |  | 9                 | 1%  |         |  | 9               | 1%  |
| Short-toed Treecreeper   | <i>Certhia brachydactyla</i>     | 47              | 0%  | Cirl Bunting             | <i>Emberiza cirlus</i>           | 8               | 0%  |                      |  | 0               | 0%  |            |  | 12                | 1%  |         |  | 0               | 0%  |
| Carrion Crow             | <i>Corvus corone cornix</i>      | 44              | 0%  | Common Cuckoo            | <i>Cuculus canorus</i>           | 7               | 0%  |                      |  | 40              | 2%  |            |  | 12                | 1%  |         |  | 0               | 0%  |
| Serin                    | <i>Serinus serinus</i>           | 43              | 0%  | Sparrow sp               | <i>Falco sp.</i>                 | 4               | 0%  |                      |  | 0               | 0%  |            |  | 0                 | 0%  |         |  | 0               | 0%  |
| Chiffchaff               | <i>Phylloscopus collybita</i>    | 42              | 0%  | Bee-eater                | <i>Merops apiaster</i>           | 2               | 0%  |                      |  | 0               | 0%  |            |  | 0                 | 0%  |         |  | 0               | 0%  |
| Blue tit                 | <i>Cyanistes caeruleus</i>       | 32              | 0%  | Not classified           | <i>Not classified</i>            | 1               | 0%  |                      |  | 20              | 1%  |            |  | 5                 | 0%  |         |  | 1               | 0%  |
| Not classified           | <i>Not classified</i>            | 29              | 0%  | Jay                      | <i>Garrulus glandarius</i>       | 1               | 0%  |                      |  | 3               | 0%  |            |  | 0                 | 0%  |         |  | 1               | 0%  |
| Sardinian Warbler        | <i>Sylvia melanocephala</i>      | 27              | 0%  | Wryneck                  | <i>Jinx torquilla</i>            | 1               | 0%  |                      |  | 0               | 0%  |            |  | 0                 | 0%  |         |  | 0               | 0%  |
| Cirl Bunting             | <i>Emberiza cirlus</i>           | 24              | 0%  | Chiffchaff               | <i>Phylloscopus collybita</i>    | 0               | 0%  |                      |  | 37              | 2%  |            |  | 0                 | 0%  |         |  | 0               | 0%  |
| Tawny Owl                | <i>Strix aluco</i>               | 23              | 0%  | Carrion Crow             | <i>Corvus corone cornix</i>      | 0               | 0%  |                      |  | 30              | 1%  |            |  | 14                | 1%  |         |  | 0               | 0%  |
| Greenfinch               | <i>Carduelis chloris</i>         | 21              | 0%  | Nightingale              | <i>Luscinia megarynchos</i>      | 0               | 0%  |                      |  | 16              | 1%  |            |  | 154               | 9%  |         |  | 1               | 0%  |
| Spotted flycatcher       | <i>Muscicapa striata</i>         | 17              | 0%  | Hoopoe                   | <i>Upupa epops</i>               | 0               | 0%  |                      |  | 14              | 1%  |            |  | 0                 | 0%  |         |  | 0               | 0%  |
| Hoopoe                   | <i>Upupa epops</i>               | 14              | 0%  | Greenfinch               | <i>Carduelis chloris</i>         | 0               | 0%  |                      |  | 12              | 1%  |            |  | 6                 | 0%  |         |  | 0               | 0%  |
| Wood Pigeon              | <i>Columba palumbus</i>          | 10              | 0%  | Short-toed Treecreeper   | <i>Certhia brachydactyla</i>     | 0               | 0%  |                      |  | 12              | 1%  |            |  | 0                 | 0%  |         |  | 27              | 2%  |
| Nuthatch                 | <i>Sitta europaea</i>            | 10              | 0%  | Sardinian Warbler        | <i>Sylvia melanocephala</i>      | 0               | 0%  |                      |  | 8               | 0%  |            |  | 18                | 1%  |         |  | 0               | 0%  |
| Green Woodpecker         | <i>Picus viridis</i>             | 9               | 0%  | Great Spotted Woodpecker | <i>Dedrocopos major</i>          | 0               | 0%  |                      |  | 2               | 0%  |            |  | 0                 | 0%  |         |  | 0               | 0%  |
| Wryneck                  | <i>Jinx torquilla</i>            | 6               | 0%  | Redstart                 | <i>Phoenichurus phoenichurus</i> | 0               | 0%  |                      |  | 1               | 0%  |            |  | 0                 | 0%  |         |  | 0               | 0%  |
| Jay                      | <i>Garrulus glandarius</i>       | 5               | 0%  | Spotted flycatcher       | <i>Muscicapa striata</i>         | 0               | 0%  |                      |  | 0               | 0%  |            |  | 17                | 1%  |         |  | 0               | 0%  |
| Sparrow sp               | <i>Falco sp.</i>                 | 4               | 0%  | Wood Pigeon              | <i>Columba palumbus</i>          | 0               | 0%  |                      |  | 0               | 0%  |            |  | 5                 | 0%  |         |  | 0               | 0%  |
| Whitethroat              | <i>Sylvia communis</i>           | 4               | 0%  | Green Woodpecker         | <i>Picus viridis</i>             | 0               | 0%  |                      |  | 0               | 0%  |            |  | 5                 | 0%  |         |  | 0               | 0%  |
| Bee-eater                | <i>Merops apiaster</i>           | 2               | 0%  | Whitethroat              | <i>Sylvia communis</i>           | 0               | 0%  |                      |  | 0               | 0%  |            |  | 4                 | 0%  |         |  | 0               | 0%  |
| Great Spotted Woodpecker | <i>Dedrocopos major</i>          | 2               | 0%  | Tawny Owl                | <i>Strix aluco</i>               | 0               | 0%  |                      |  | 0               | 0%  |            |  | 0                 | 0%  |         |  | 13              | 1%  |
| Wren                     | <i>Troglodytes troglodytes</i>   | 1               | 0%  | Nuthatch                 | <i>Sitta europaea</i>            | 0               | 0%  |                      |  | 0               | 0%  |            |  | 0                 | 0%  |         |  | 1               | 0%  |
| Redstart                 | <i>Phoenichurus phoenichurus</i> | 1               | 0%  | Wren                     | <i>Troglodytes troglodytes</i>   | 0               | 0%  |                      |  | 0               | 0%  |            |  | 0                 | 0%  |         |  | 0               | 0%  |
